limb blocks and increasing local anesthetic dosage were associated with an increased risk of LAST. Importantly, this large series provides the strongest evidence to date that ultrasound-guidance significantly decreases the incidence of LAST.

### 10th Annual Celebration of Research Luncheon Session

**Monday, October 15, 2012, 12:30 PM to 2:00 PM, Ballroom A, Walter E. Washington Convention Center, Washington, D.C. Lunch will be provided!**

This year's Celebration of Research will take place on Monday during the Annual Meeting. James C. Eisenach, M.D., Ed-

itor-in-Chief of ANESTHESIOLOGY, will serve as moderator. Featured speakers will be the 2012 recipient of the ASA Excellence in Research Award, Ralph Lydic, Ph.D., Professor, Department of Anesthesiology, University of Michigan Medical School, Ann Arbor, Michigan, and the recipient of the 2012 Presidential Scholar Award, Peter Nagele, M.D., M.Sc., Assistant Professor, Department of Anesthesiology, Washington University School of Medicine, St. Louis, Missouri. The recipients of the 2012 Resident Research Awards will also be introduced during the Celebration event. Additional information regarding Journal-related activities and FAER-related activities will be included in the Celebration of Research booklet distributed at the 2012 Annual Meeting.

## ANESTHESIOLOGY REFLECTIONS FROM THE WOOD LIBRARY-MUSEUM

### *Uncle Sam* and Massachusetts General Hospital

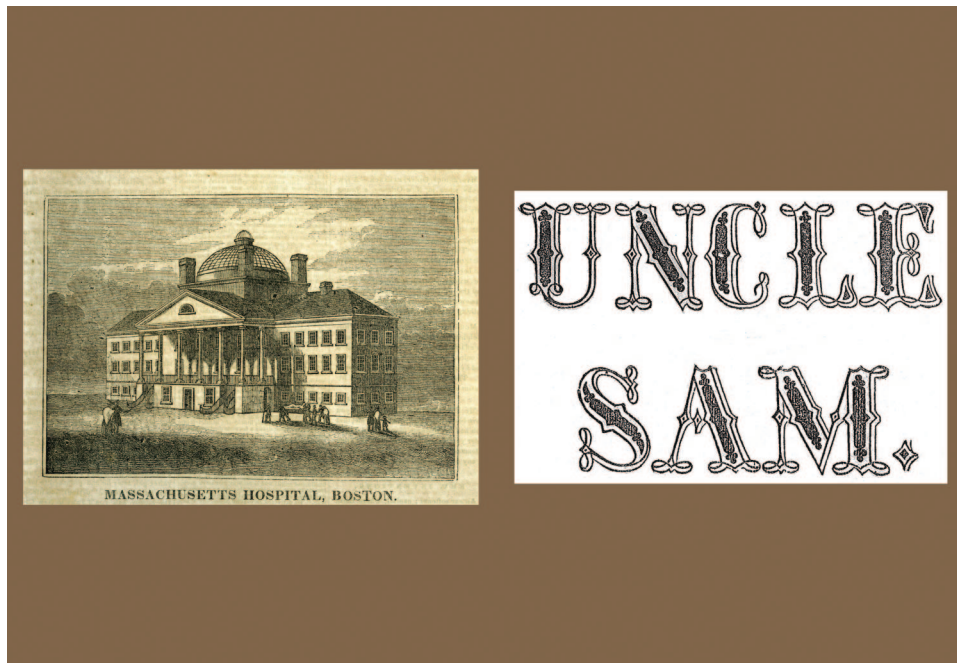

On Saturday morning, March 16, 1844, a Boston newspaper named *Uncle Sam* featured an engraving of "Massachusetts Hospital, Boston." Just 31 months later, on October 16, 1846, dentist William Thomas Green Morton gave his public demonstration of surgical anesthesia at that hospital. The weekly paper, *Uncle Sam*, would evolve into a literary magazine; Massachusetts General Hospital, into a complex so massive that visitors now have difficulty finding the Ether Dome. (Copyright © the American Society of Anesthesiologists, Inc.)

George S. Bause, M.D., M.P.H., Honorary Curator, ASA's Wood Library-Museum of Anesthesiology, Park Ridge, Illinois, and Clinical Associate Professor, Case Western Reserve University, Cleveland, Ohio. UJYC@aol.com.
